# Supplementary material
Source: Springer Nature journal article supplement (http://www.springermedizin.de/resource/supplementary/12893_2013_496_MOESM2_ESM.pdf/9512562)

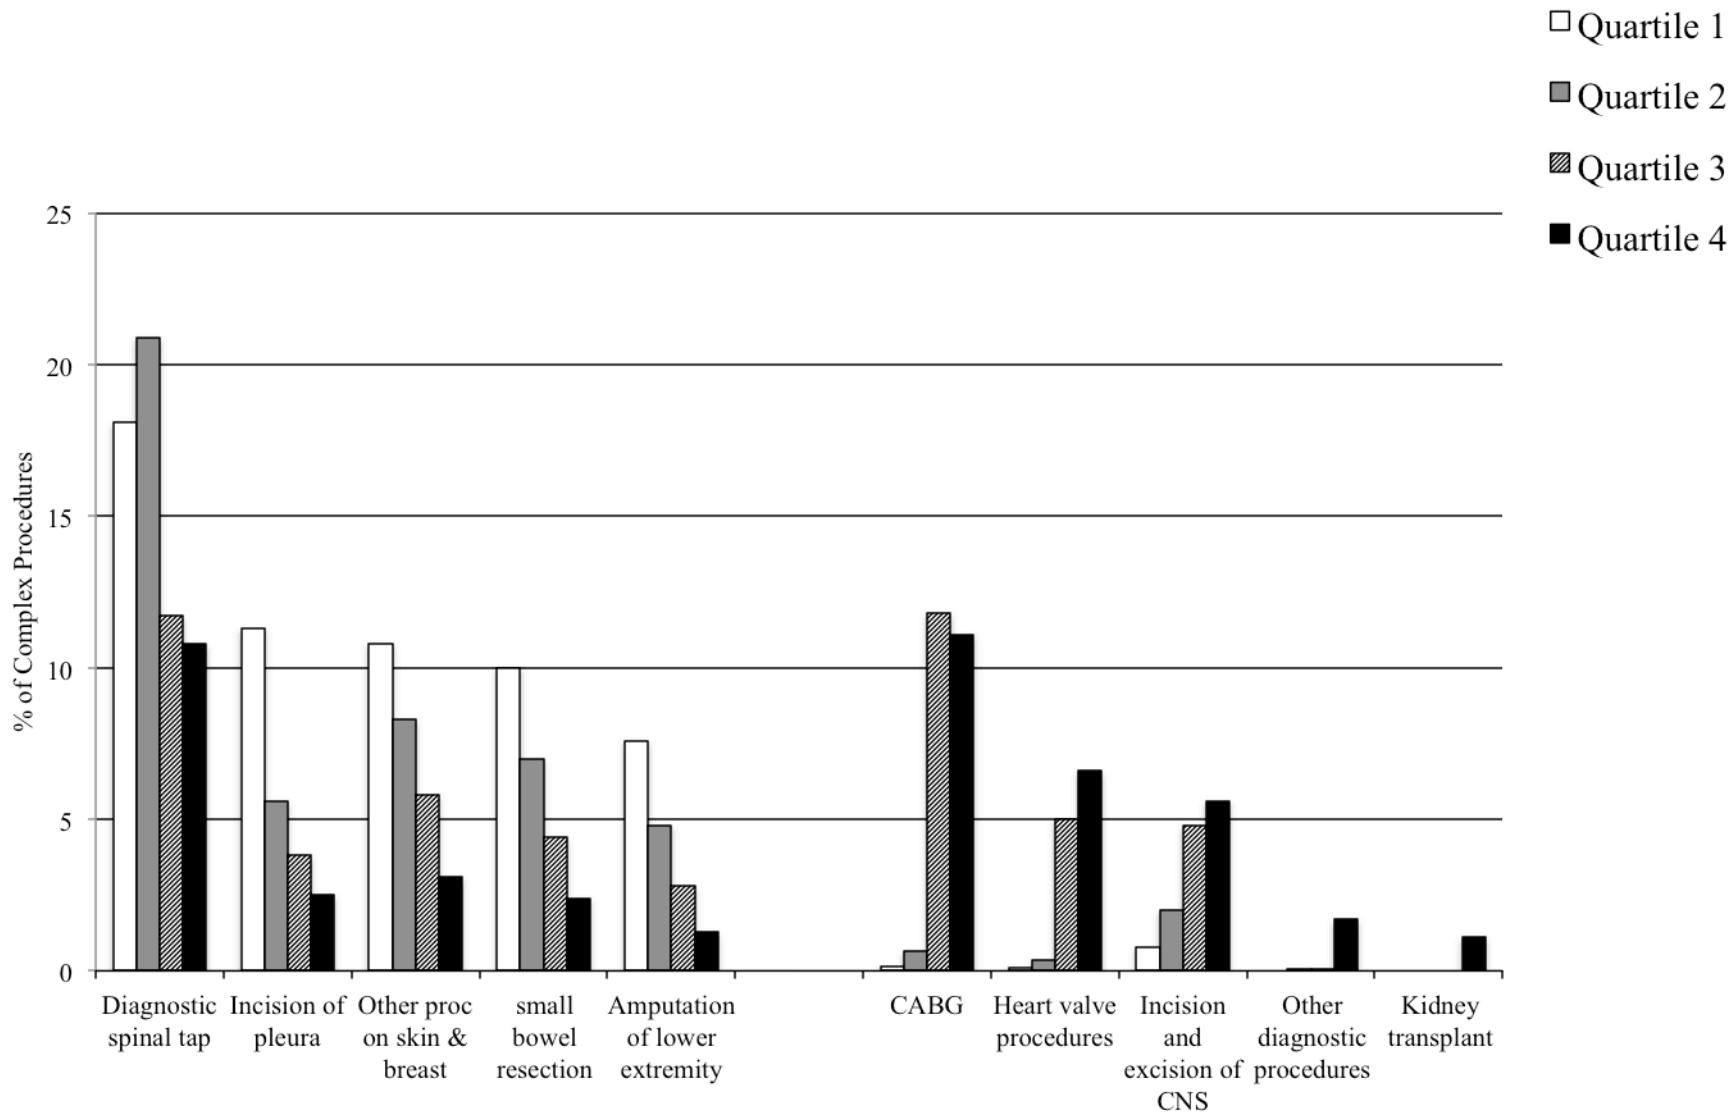

Supplement: MOESM2 [file 9512562]
